# Supplementary material for: Caging tin oxide in three-dimensional graphene networks for superior volumetric lithium storage
Source: PubMed Central journal article supplement (PMC5786064; doi:10.1038/s41467-017-02808-2), 2018-01-26
Supplement: 41467_2017_2808_MOESM1_ESM.pdf [file 41467_2017_2808_MOESM1_ESM.pdf]

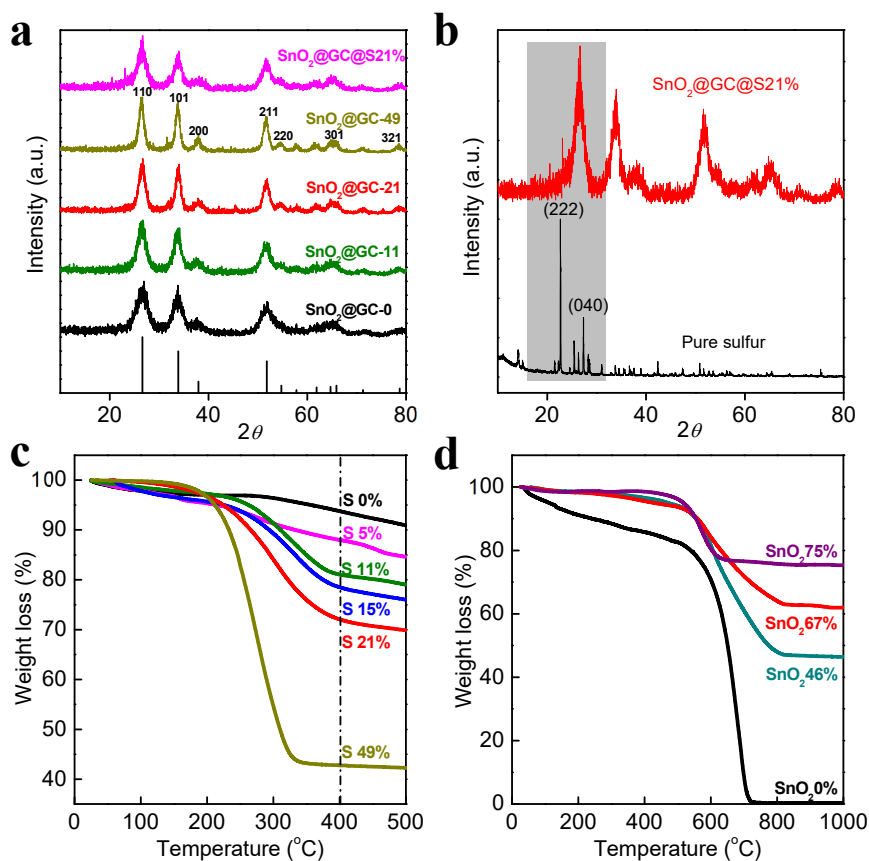

**Supplementary Figure 1. The existence and content of SnO<sub>2</sub> in SnO<sub>2</sub>@GCs.** XRD patterns of (a) SnO<sub>2</sub>@GC-0, 11, 21, 49, SnO<sub>2</sub>@GC@S21% and (b) pure sulfur. (c) TGA curves of SnO<sub>2</sub>@GCs with different original sulfur content of 0%, 5%, 11%, 15%, 21% and 49% in N<sub>2</sub> atmosphere. (d) TGA curves of SnO<sub>2</sub>@GCs with the SnO<sub>2</sub> content of 0%, 46%, 67% and 75% measured in air atmosphere. Note that the sulfur content is calculated based on the whole SnO<sub>2</sub>@GC@S, while the SnO<sub>2</sub> content is calculated based on the mass of SnO<sub>2</sub>@GC after sulfur removal. Also, note that the SnO<sub>2</sub>@GCs with various original sulfur content have the same SnO<sub>2</sub> content of 67%, while the SnO<sub>2</sub>@GCs with various SnO<sub>2</sub> content have the same original sulfur loading as SnO<sub>2</sub>@GC-21.

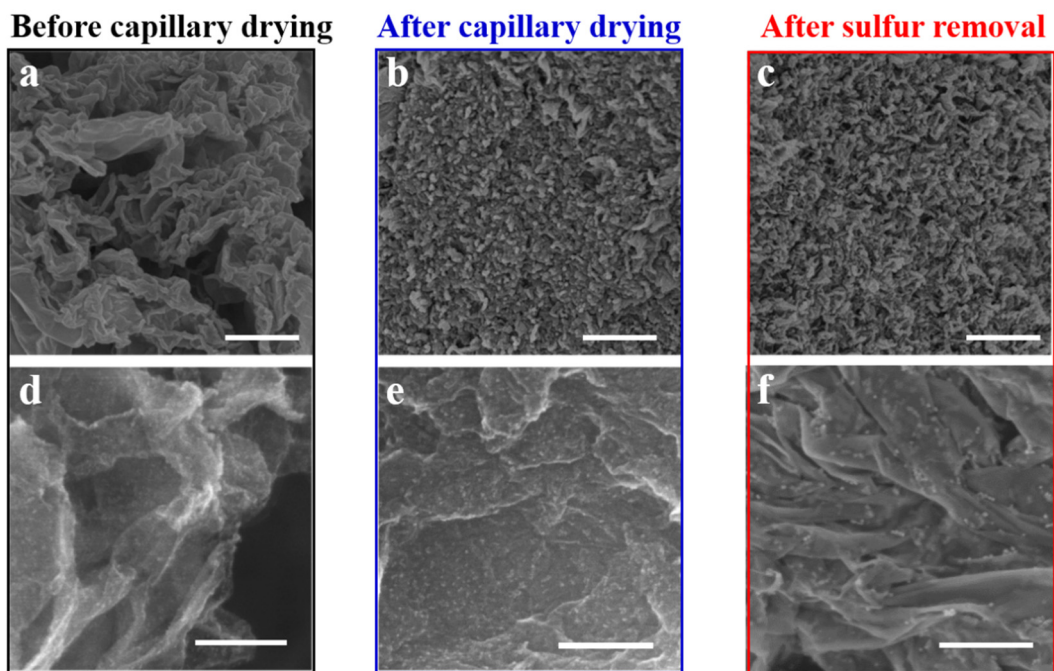

**Supplementary Figure 2. Morphology change during the SnO<sub>2</sub>@GC-21 synthesis process.** SEM images of the sample (**a, d**) before capillary drying, (**b, e**) after capillary drying and (**c, f**) after sulfur removal process in low and high resolutions, respectively. Scale bars, (**a–c**) 1 μm; (**d–f**) 200 nm.

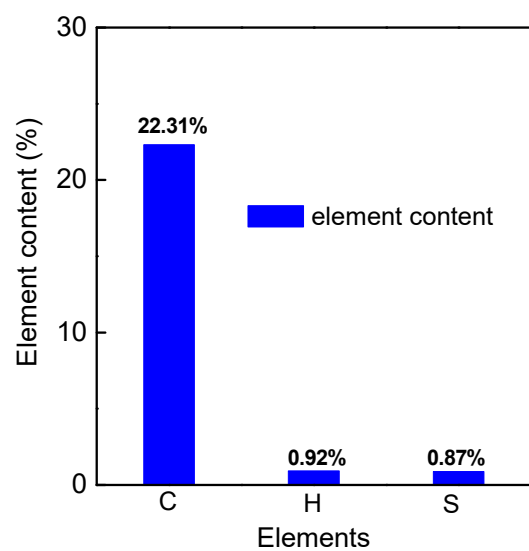

**Supplementary Figure 3.** CHNS analysis of C, H and S elements content in SnO<sub>2</sub>@GC-21.

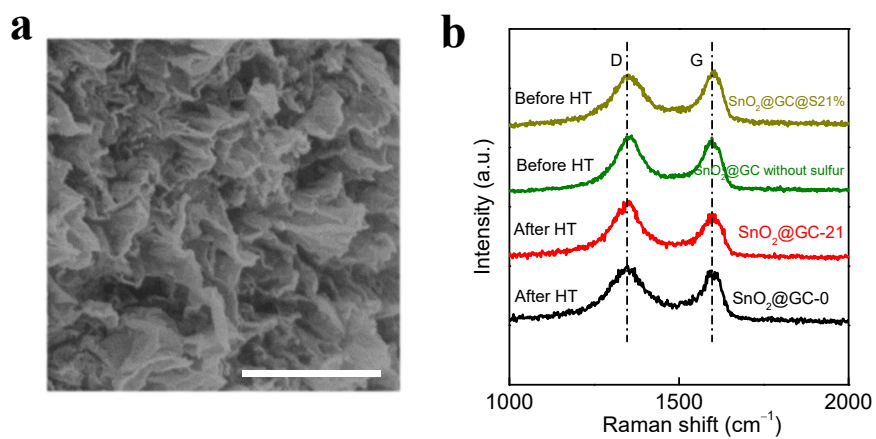

**Supplementary Figure 4. Morphology characterization of 3D graphene cage. (a)** SEM image of a 3D graphene cage after heat treatment (HT). **(b)** Raman spectra of SnO<sub>2</sub>@GC-21 and SnO<sub>2</sub>@GC-0 before and after 400 °C treatments (for SnO<sub>2</sub>@GC-21, this is a sulfur removal process). Scale bar, **(a)** 500 nm.

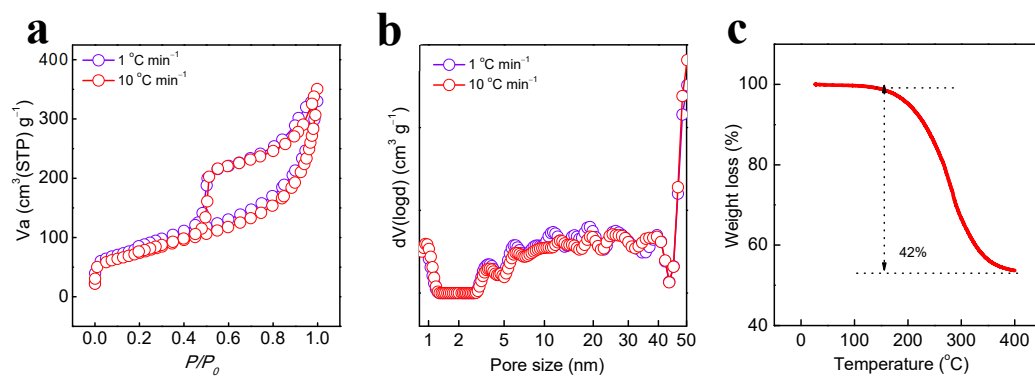

**Supplementary Figure 5. Influence of sulfur removal on pore structure of graphene cage. (a)**

Nitrogen adsorption-desorption isotherms and **(b)** pore size distributions of GC@S (loading sulfur in the graphene cage free of  $\text{SnO}_2$ ) subjected to the heat treatments ( $400 \text{ }^\circ\text{C}$ ) with the heating rate of  $1 \text{ }^\circ\text{C min}^{-1}$  and  $10 \text{ }^\circ\text{C min}^{-1}$ , respectively. **(c)** TGA curve of GC@S. The preparation of GC@S was similar to that of the  $\text{SnO}_2@\text{GC}@S$  but free of the addition of  $\text{SnCl}_4 \cdot 5\text{H}_2\text{O}$  as the precursor of  $\text{SnO}_2$ .

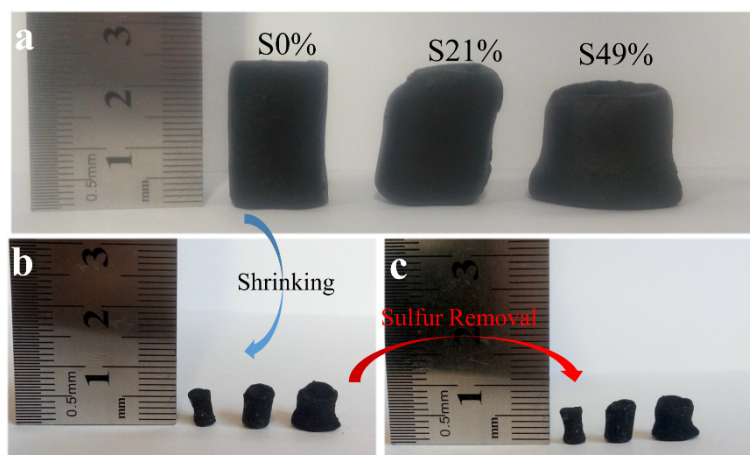

**Supplementary Figure 6. Volume changes of the SnO<sub>2</sub>@GCs during capillary drying and sulfur removal process.** Photos of (a) hydrogels, (b) the capillary shrinkage-induced monolith of SnO<sub>2</sub>@GC@S (before sulfur removal), and (c) the SnO<sub>2</sub>@GCs (after sulfur removal).

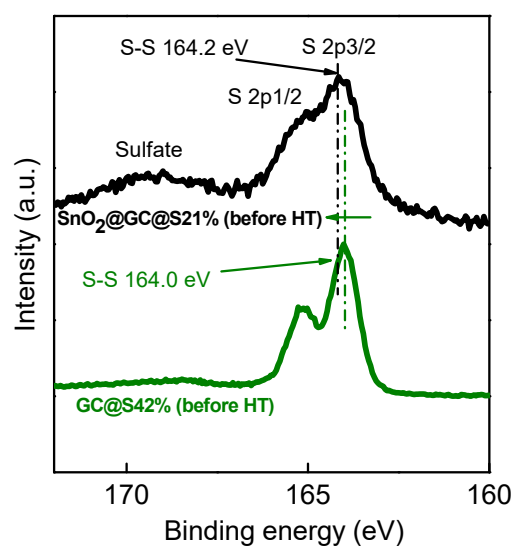

**Supplementary Figure 7.** S 2p XPS spectra with a 0.2 eV difference for S-S bond between  $\text{GC}@S42\%$  (before HT) and  $\text{SnO}_2@\text{GC}@S21\%$  (before HT).

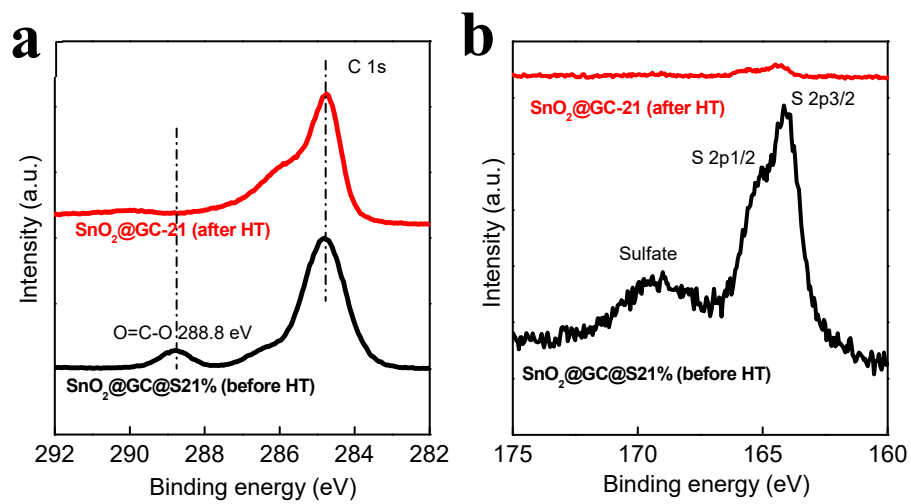

**Supplementary Figure 8. C 1s and S 2p XPS spectra before and after sulfur removal process.**

(a) C 1s XPS spectra with O=C-O bond change, and (b) S 2p XPS spectra change after sulfur removal.



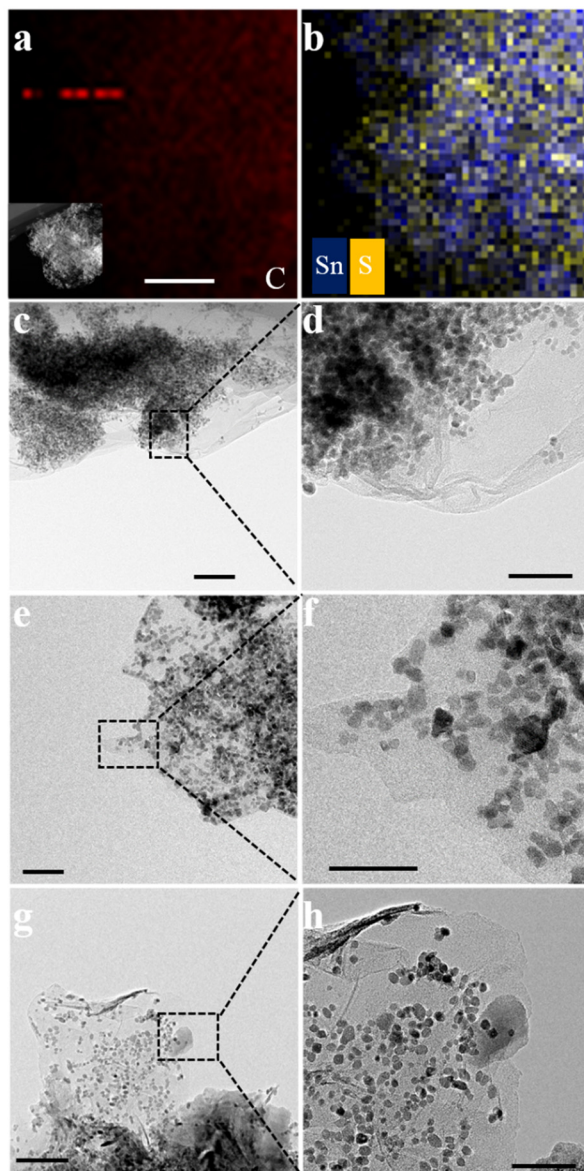

**Supplementary Figure 9. Void space change with various original sulfur content. (a, b)** STEM and EDS of SnO<sub>2</sub>@GC-21 in a relatively low magnification. **(c, d)** TEM images of SnO<sub>2</sub> NPs in SnO<sub>2</sub>@GC-0 without sulfur templating. SnO<sub>2</sub> NPs distribution in SnO<sub>2</sub>@GC-21 **(e, f)** and -49 **(g, h)**. Scale bars, **(a)** 200 nm; **(c)** 100 nm; **(d)** 50 nm; **(e)** 100 nm; **(f)** 50 nm; **(g)** 100 nm; **(h)** 50 nm.

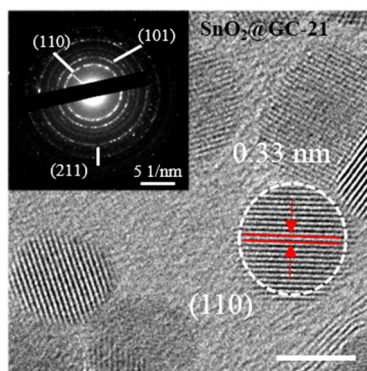

**Supplementary Figure 10.** HRTEM and SAED images of SnO<sub>2</sub>@GC-21. Scale bar, 5 nm.

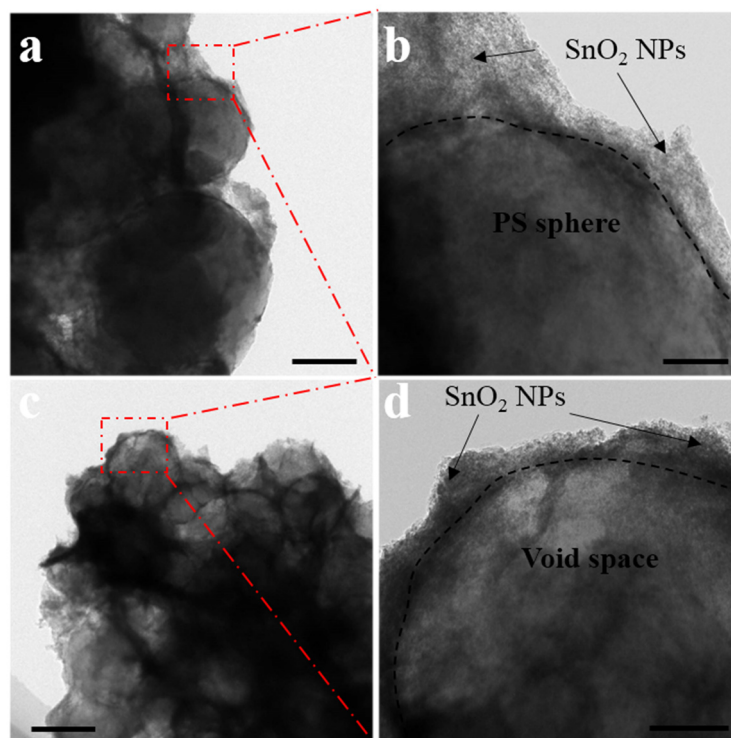

**Supplementary Figure 11. PS templated SnO<sub>2</sub>@GC. (a–d) TEM images of PS sphere templating in SnO<sub>2</sub>@GC. Scale bars, (a) 500 nm; (b) 100 nm; (c) 500 nm; (d) 100 nm.**

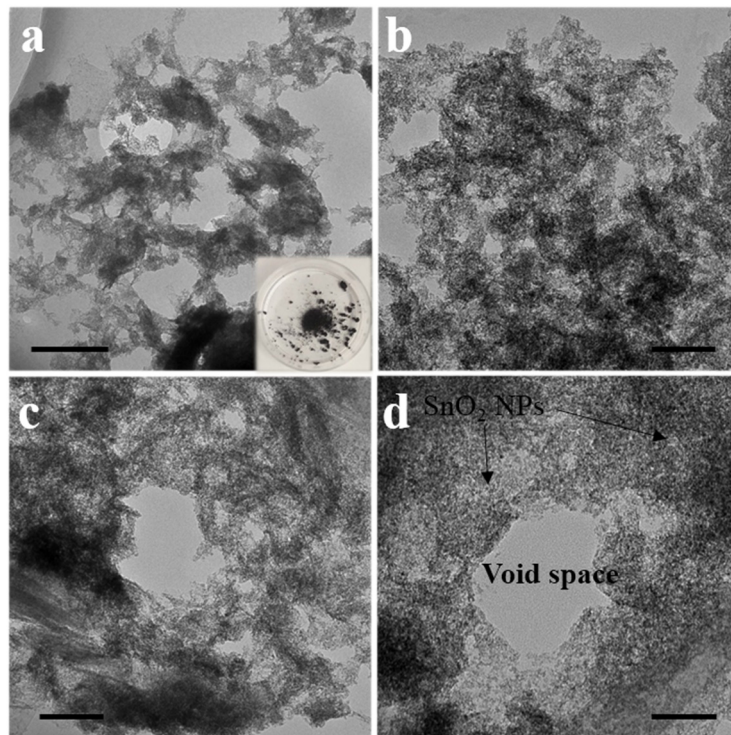

**Supplementary Figure 12. NaCl templated SnO<sub>2</sub>@GC. (a–d)** TEM images of NaCl templating for void space incorporation. Scale bars, **(a)** 500 nm; **(b–c)** 200 nm; **(d)** 100 nm.

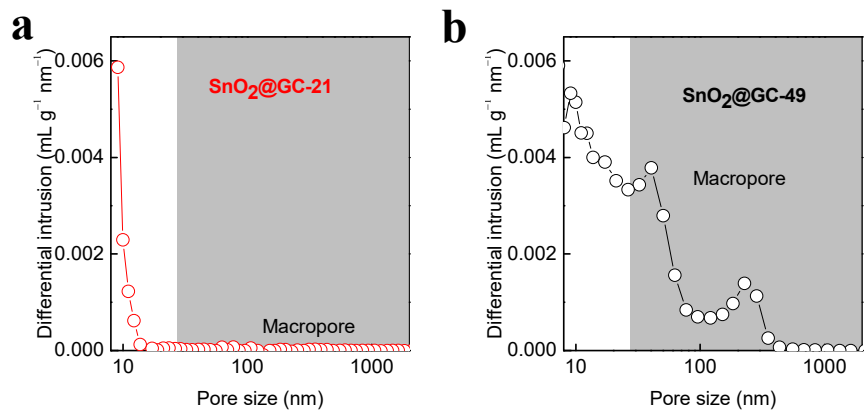

**Supplementary Figure 13. Mercury intrusion porosimetry characterizations.** Pore size distributions of SnO<sub>2</sub>@GC-21 (a), -49 (b) from Mercury intrusion porosimetry (MIP) analysis.

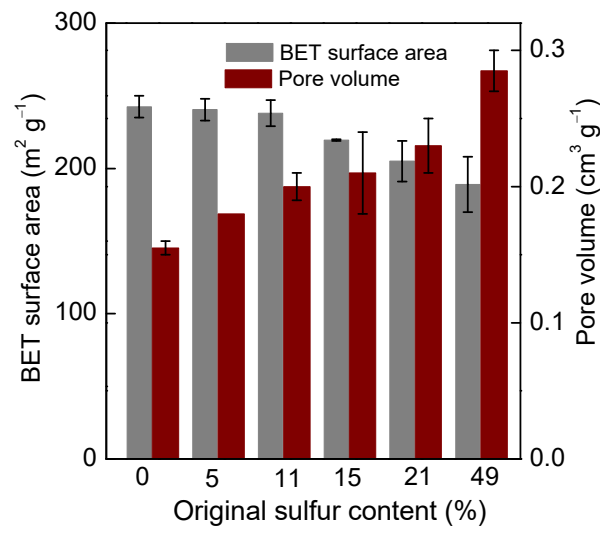

**Supplementary Figure 14.** The BET specific area and pore volume changes of the SnO<sub>2</sub>@GCs with different content of sulfur as the removable templates. Error bars indicate s.d. (n = 3).

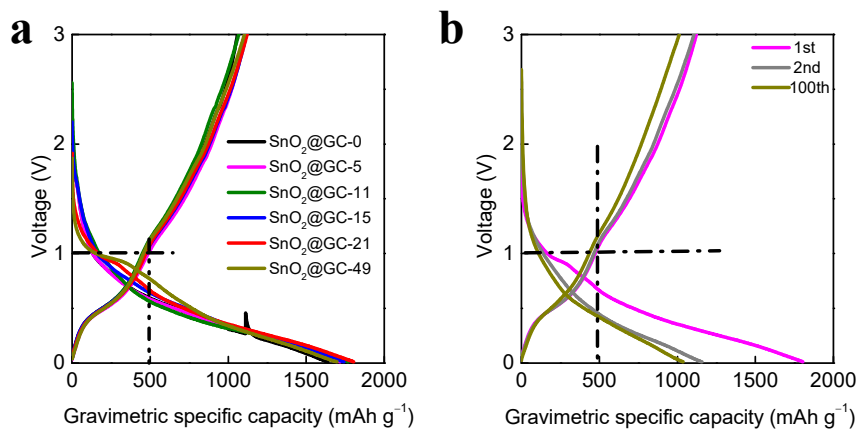

**Supplementary Figure 15. Galvanostatic charge/discharge characterizations.** Galvanostatic charge/discharge profiles of (a) the first cycle of SnO<sub>2</sub>@GCs and (b) the first two and the 100<sup>th</sup> cycles of SnO<sub>2</sub>@GC-21.

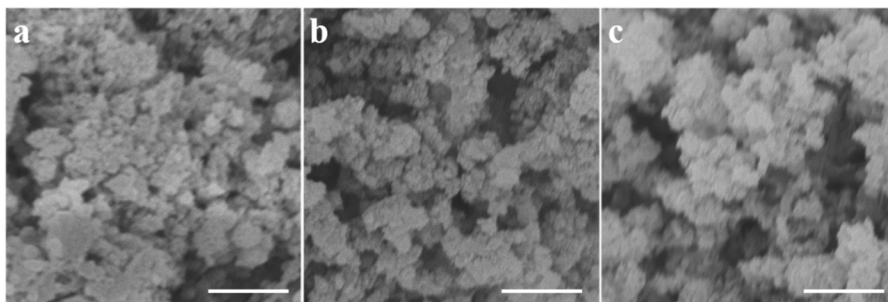

**Supplementary Figure 16. Electrode morphology of SnO<sub>2</sub>@GCs after cycling.** SEM images of SnO<sub>2</sub>@GC-0 (**a**), -21 (**b**) and -49 (**c**) after 300 cycles at a current density of 100 mA g<sup>-1</sup>. Scale bars, (**a-c**) 500 nm.



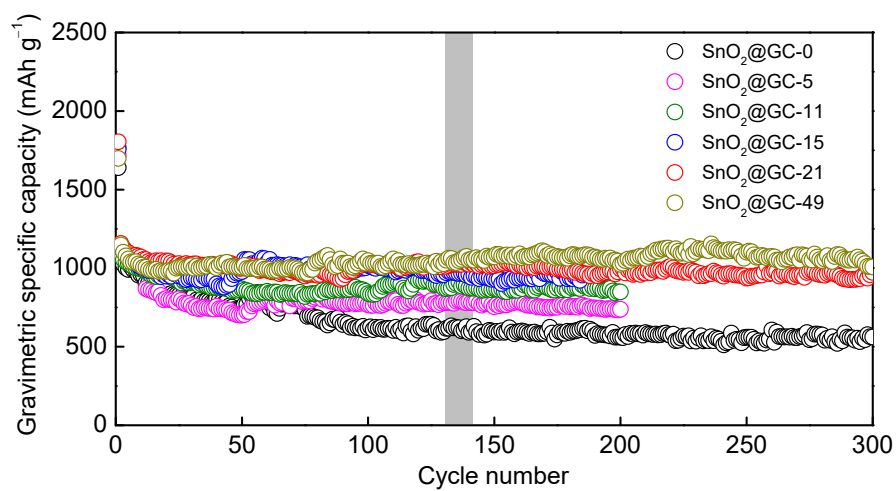

**Supplementary Figure 17.** Cycling performance of SnO<sub>2</sub>@GCs at 100 mA g<sup>-1</sup>.

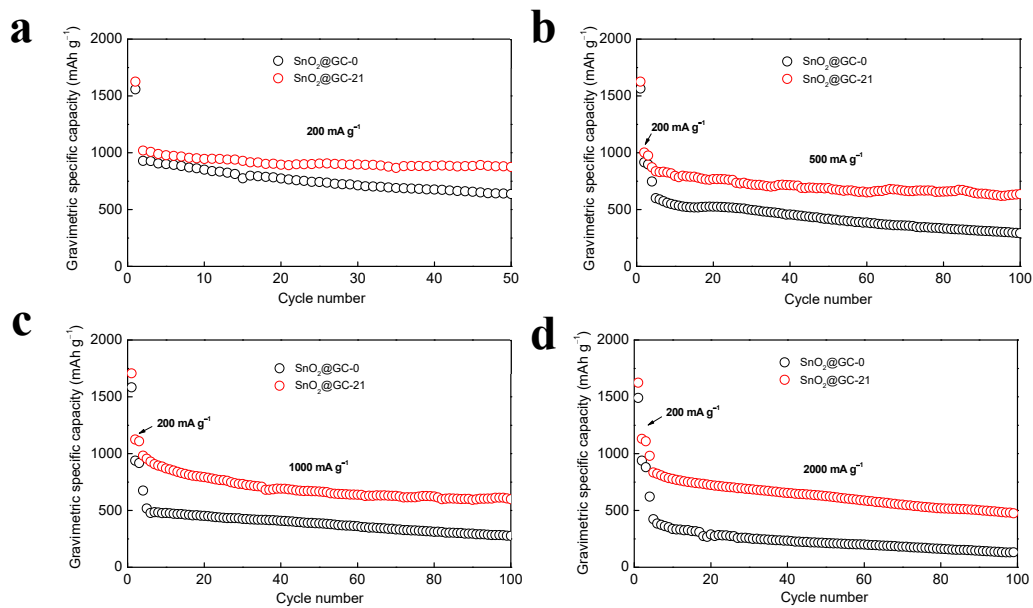

**Supplementary Figure 18. Electrochemical performance with various C-rate.** The cycling performance of  $\text{SnO}_2@\text{GC-0}$  and  $-\text{21}$  at different current densities of **(a)**  $200 \text{ mA g}^{-1}$ , **(b)**  $500 \text{ mA g}^{-1}$ , **(c)**  $1000 \text{ mA g}^{-1}$ , **(d)**  $2000 \text{ mA g}^{-1}$ .

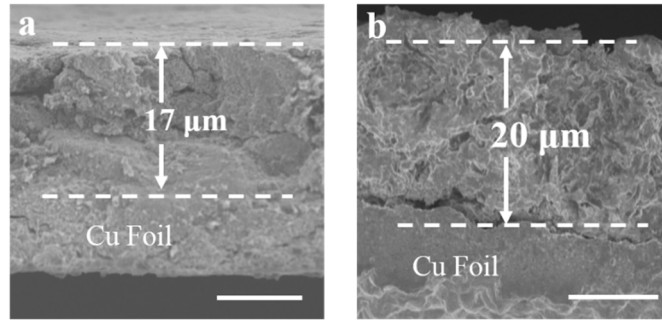

**Supplementary Figure 19. Electrode thickness change after lithiation.** (a) SEM image of the SnO<sub>2</sub>@GC-21 electrode containing binder and carbon black. (b) SEM image of the SnO<sub>2</sub>@GC-21 electrode upon lithiation. Scale bars, (a–b) 10 μm.

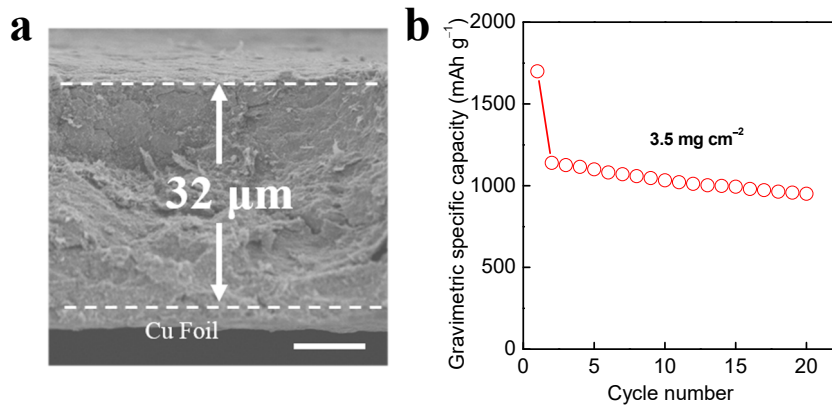

**Supplementary Figure 20. Thick electrode characterizations. (a)** Cross-sectional SEM image of thick SnO<sub>2</sub>@GC-21 electrode morphology. **(b)** The cycling performance of SnO<sub>2</sub>@GC-21 with a high mass loading of active materials at an areal current density of 0.2 mA cm<sup>-2</sup>. Scale bar, **(a)** 10 μm.

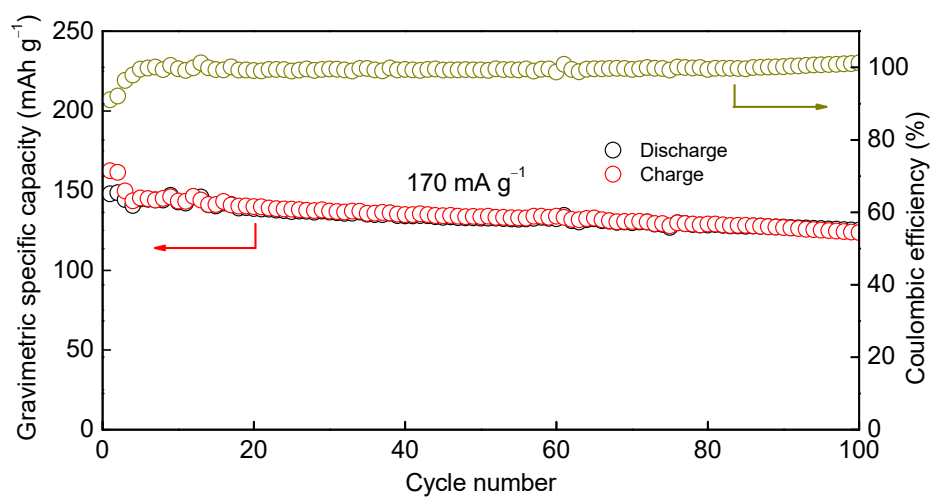

**Supplementary Figure 21.** Reversible capacity and Coulombic efficiency *versus* cycle plots of the LCO/SnO<sub>2</sub>@GC-21 full cell with electrochemical pre-lithiation.

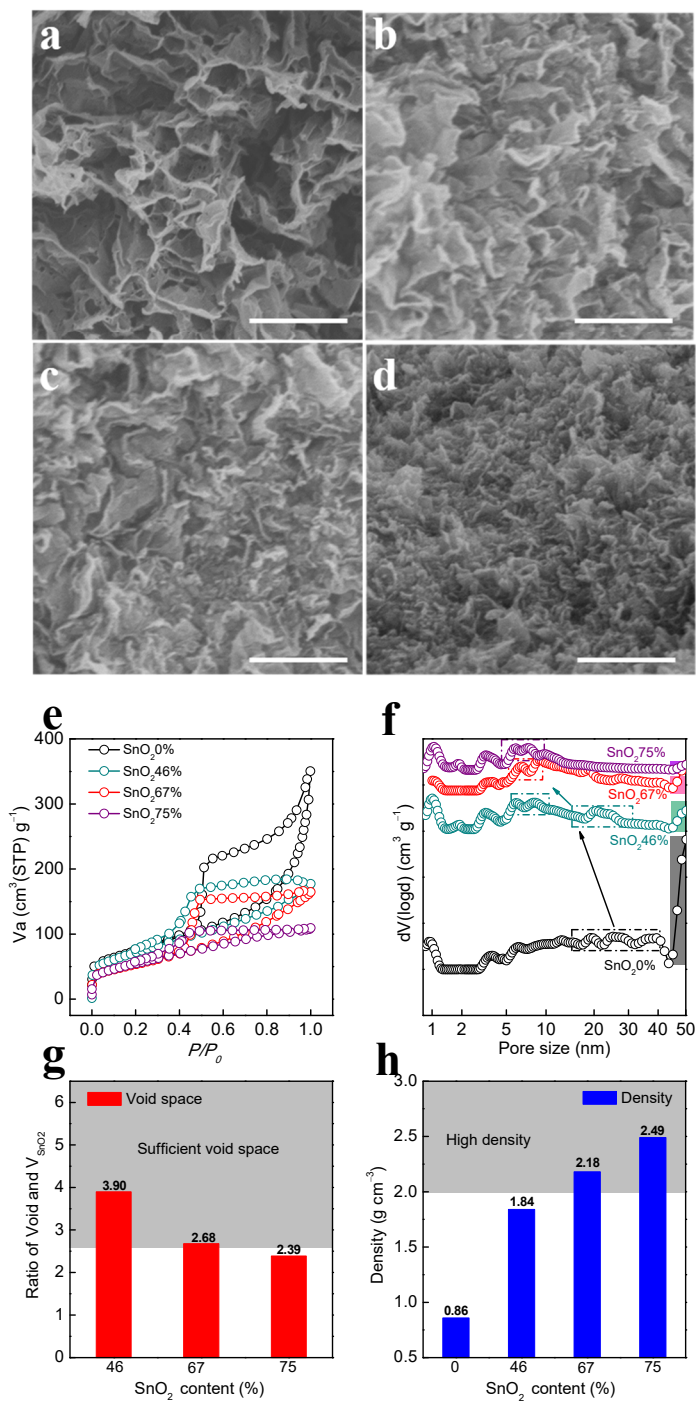

**Supplementary Figure 22. Structure change with various SnO<sub>2</sub> content.** (a–d) SEM images, (e) nitrogen adsorption-desorption isothermals, (f) pore size distributions, (g) calculated void spaces based on the SnO<sub>2</sub> volume, and (h) densities of SnO<sub>2</sub>@GCs with different SnO<sub>2</sub> content of 0%, 46%, 67% and 75%. Scale bars, (a–d) 500 nm.

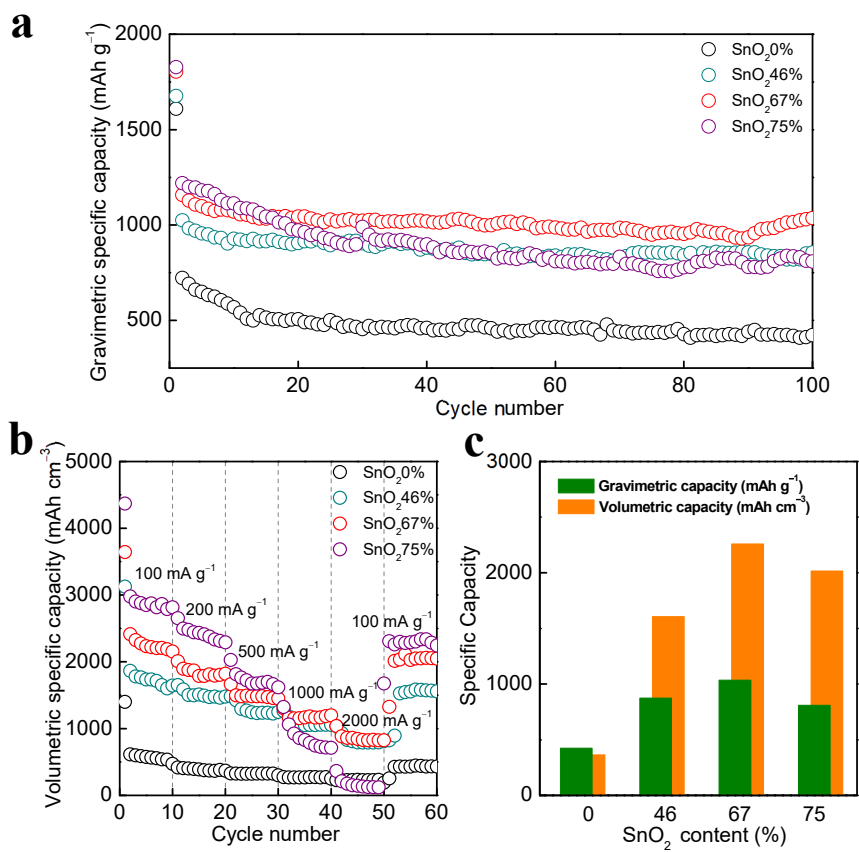

**Supplementary Figure 23. Electrochemical performance with various SnO<sub>2</sub> content. (a)** Cycling performance and **(b)** rate performance of SnO<sub>2</sub>@GCs with different SnO<sub>2</sub> content of 0%, 46%, 67% and 75%. **(c)** Volumetric and gravimetric capacities of SnO<sub>2</sub>@GCs with the SnO<sub>2</sub> content of 0%, 46%, 67% and 75%.

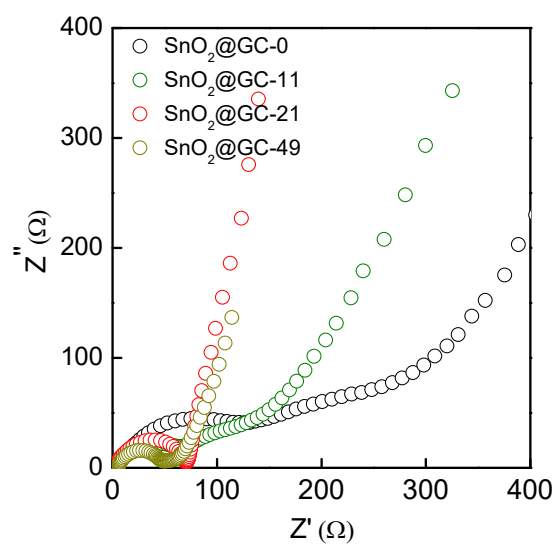

**Supplementary Figure 24.** Electrochemical impedance spectra of SnO<sub>2</sub>@GCs before cycling.



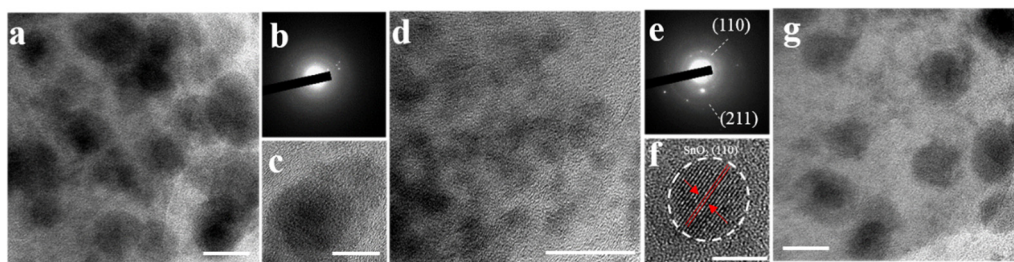

**Supplementary Figure 25.** *Ex situ* TEM characterization of SnO<sub>2</sub> volume change after lithiation. TEM and SAED images of (a–c) SnO<sub>2</sub>@GC-21 and (d–f) SnO<sub>2</sub>@GC-0 upon lithiation. (g) TEM image of SnO<sub>2</sub>@GC-49 upon lithiation. Scale bars, (a) 20 nm; (c) 10 nm; (d) 20 nm; (f) 5 nm; (g) 20 nm.

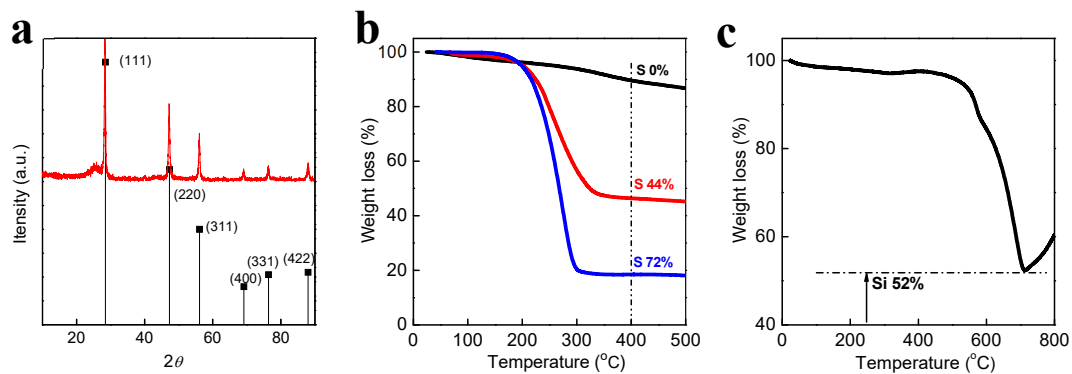

**Supplementary Figure 26. The existence and content of Si. (a)** XRD of Si@GC. **(b)** TGA curves of Si@GC-0, -44 and -72 with original sulfur content of 0%, 44% and 72%, respectively. **(c)** TGA curve of the Si@GC.

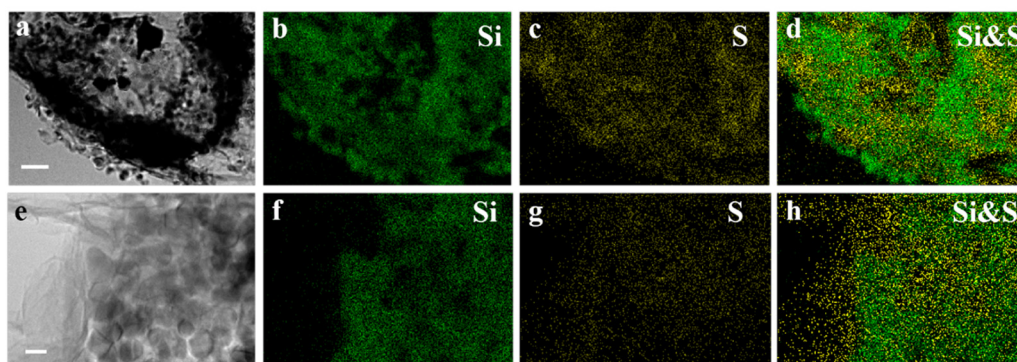

**Supplementary Figure 27.** The Si and S element distributions in Si@GC@S. EDS of the Si@GC@S44% in a low magnification (**a–d**) and a relatively high magnification (**e–h**). Scale bars, (**a**) 200 nm; (**e**) 50 nm.

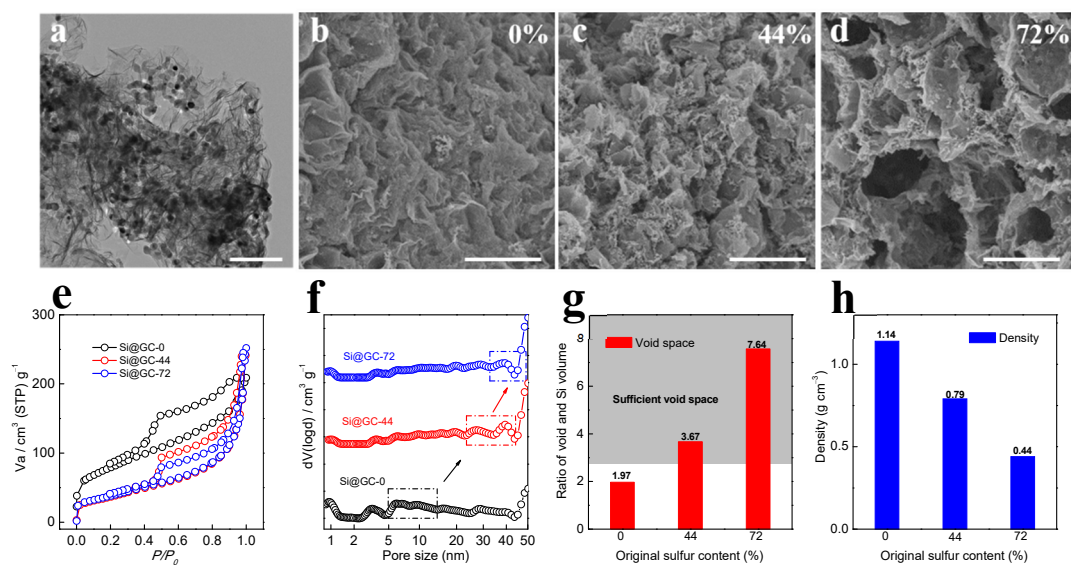

**Supplementary Figure 28. Structure change of Si@GCs with various sulfur content. (a)** TEM image of the Si NPs (~50 nm) distribution in the graphene cage. **(b–d)** SEM images of Si@GC-0, -44 and -72. **(e)** Nitrogen adsorption-desorption isotherms, **(f)** pore size distributions, **(g)** calculated void space and **(h)** density changes of Si@GCs. Scale bars, **(a)** 500 nm; **(b–d)** 5  $\mu$ m.

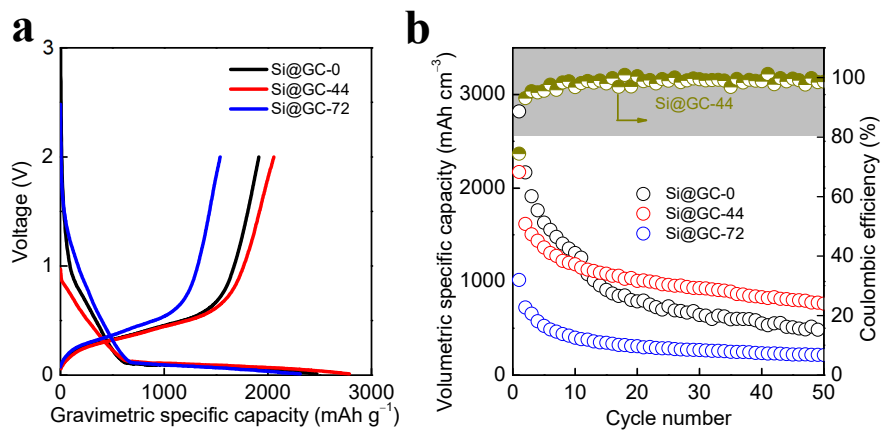

**Supplementary Figure 29. Galvanostatic charge/discharge characterizations.** Galvanostatic charge/discharge profiles of **(a)** the first cycle of Si@GCs, **(b)** cycling performance of Si@GCs at  $200 \text{ mA g}^{-1}$ .

**Supplementary Table 1. Comparison of volumetric capacity of SnO<sub>2</sub>@GC-21 with the reported representative Si, Sn-based anodes in LIBs.**

| Materials                                      | Density of active materials (g cm <sup>-3</sup> ) | Volumetric capacity based on the active materials (mAh cm <sup>-3</sup> ) | Density of electrode (g cm <sup>-3</sup> ) | Volumetric capacity based on the electrode (mAh cm <sup>-3</sup> ) | cycles | Current Density         | Voltage    | Active material mass loading (mg cm <sup>-2</sup> ) | Binder (content)     | Ref       |
|------------------------------------------------|---------------------------------------------------|---------------------------------------------------------------------------|--------------------------------------------|--------------------------------------------------------------------|--------|-------------------------|------------|-----------------------------------------------------|----------------------|-----------|
| SnO <sub>2</sub> @GC-21                        | 2.18                                              | 2123                                                                      | 1.38                                       | 1075                                                               | 300    | 100 mA g <sup>-1</sup>  | 0.01–3 V   | 1.87                                                | 10% PVDF             | This work |
| PVP-Sn(IV)@Ti3C                                | 2.16                                              | 1374.8                                                                    | N/A                                        | N/A                                                                | 50     | 100 mA g <sup>-1</sup>  | 0.01–3 V   | N/A                                                 | 15% PVDF             | 1         |
| Fe <sub>2</sub> O <sub>3</sub> -G <sub>2</sub> | 2.3                                               | 1403                                                                      | 1.3                                        | 634                                                                | 100    | 200 mA g <sup>-1</sup>  | 0.005–3 V  | 1.89                                                | 10% PVDF             | 2         |
| Sn/C nanocomposite                             | 1.92                                              | 1700                                                                      | 1.92                                       | 1700                                                               | 200    | 0.5 C                   | 0.01–3 V   | N/A                                                 | binder-free          | 3         |
| NHGM                                           | 1.1                                               | 1052                                                                      | N/A                                        | N/A                                                                | 1200   | 0.1 mA cm <sup>-2</sup> | 0.01–3 V   | 2.75                                                | 5% PVDF              | 4         |
| The bowl-like SnO <sub>2</sub> @C              | 0.24                                              | 231                                                                       | N/A                                        | N/A                                                                | 100    | 400 mA g <sup>-1</sup>  | 0.005–3 V  | N/A                                                 | 10% PVDF             | 5         |
| t-Si@GN arrays                                 | 1.0                                               | 1500                                                                      | 1.0                                        | 1500                                                               | 200    | 840 mA g <sup>-1</sup>  | 0.02–2 V   | 0.9                                                 | binder-free          | 6         |
| 3D Si membrane                                 | 0.167                                             | 429                                                                       | 0.167                                      | 429                                                                | 100    | 300 mA g <sup>-1</sup>  | 0.01–1.5 V | N/A                                                 | binder-free          | 7         |
| SiNP-PANi                                      | 0.899                                             | 1078                                                                      | 0.899                                      | 1078                                                               | 600    | 1000 mA g <sup>-1</sup> | 0.01–1 V   | 0.3                                                 | binder-free          | 8         |
| SiNW fabric                                    | 0.233                                             | 116.5                                                                     | 0.233                                      | 116.5                                                              | 100    | 179 mA g <sup>-1</sup>  | 0.01–1 V   | N/A                                                 | binder-free          | 9         |
| SSG                                            | 1.926                                             | 1087                                                                      | N/A                                        | N/A                                                                | 60     | 239 mA g <sup>-1</sup>  | 0.01–3 V   | 2.29                                                | 3% CMC               | 10        |
| Si-C granule                                   | 0.49                                              | 779                                                                       | N/A                                        | N/A                                                                | 100    | 1 C                     | 0–1.1 V    | N/A                                                 | PVDF with 10 wt% PAA | 11        |

|                                           |       |                |       |                  |      |                         |            |                   |                          |    |
|-------------------------------------------|-------|----------------|-------|------------------|------|-------------------------|------------|-------------------|--------------------------|----|
| <b>SG-Si-c-PAN</b>                        | N/A   | N/A            | 0.85  | 2350             | 100  | 100 mA g <sup>-1</sup>  | 0.05–1.5 V | 1.3–2.5           | PAN                      | 12 |
| <b>SiNW-PG</b>                            | N/A   | N/A            | 1.5   | 1014             | 100  | 0.2 C                   | 0.05–1.4 V | N/A               | SBR and CMC (15%)        | 13 |
| <b>FeO<sub>x</sub>@C-2</b>                | N/A   | N/A            | 0.35  | 280              | 100  | 200 mA g <sup>-1</sup>  | 0.01–3 V   | N/A               | 10% PVDF                 | 14 |
| <b>Si pomegranate</b>                     | N/A   | N/A            | 0.4   | 1270             | 1000 | C/2                     | 0.01–1 V   | ~ 0.2             | 10% PVDF                 | 15 |
| <b>SiNP-alginate</b>                      | N/A   | N/A            | 0.5   | 850              | 100  | 4200 mA g <sup>-1</sup> | 0.01–1 V   | N/A               | sodium alginate          | 16 |
| <b>nC-SiMP</b>                            | N/A   | N/A            | 0.55  | 665              | 1000 | C/4                     | 0.01–1 V   | ~ 0.5             | 10% PVDF                 | 17 |
| <b>Si-SHP/CB (after volume expansion)</b> | N/A   | N/A            | 1.1   | 1301             | 120  | 0.1 mA cm <sup>-2</sup> | 0.01–1 V   | 1.70              | Self-healing polymer     | 18 |
| <b>5wt%-Gr-Si</b>                         | N/A   | N/A            | N/A   | 2500             | 1    | N/A                     | 0.01–1.5 V | 1.2               | 1.1M Li-polyacrylic acid | 19 |
| <b>Gr-Si-CNM</b>                          | ~ 2.3 | 2821 (average) | ~ 2.3 | 2821 (average)   | 1000 | 1800 mA g <sup>-1</sup> | 0.01–1.5 V | 0.07              | binder-free              | 20 |
| <b>SF electrode</b>                       | N/A   | N/A            | N/A   | 1799             | 150  | 500 mA g <sup>-1</sup>  | 0.02–1.0 V | 0.9–1.5           | sodium alginate          | 21 |
| <b>h-SnO<sub>2</sub>@Si-2</b>             | N/A   | N/A            | 1.33  | 1030             | 500  | 100 mA g <sup>-1</sup>  | 0.01–~1 V  | 1.9–2.0           | N/A                      | 22 |
| <b>Fe<sub>2</sub>N@C electrode</b>        | N/A   | N/A            | N/A   | 1030 (lithiated) | 50   | 100 mA g <sup>-1</sup>  | 0.01–3 V   | 12 μm (lithiated) | N/A                      | 23 |

**Supplementary Table 2.** The detailed experimental parameters for materials preparations.

| Sample                    | GO(mL)                              | Na <sub>2</sub> S <sub>2</sub> O <sub>3</sub> ·5H <sub>2</sub> O(g)   | HCl(mL)                                   | SnCl <sub>4</sub> ·5H <sub>2</sub> O(mg) |
|---------------------------|-------------------------------------|-----------------------------------------------------------------------|-------------------------------------------|------------------------------------------|
| SnO <sub>2</sub> @GC@S0%  | 57                                  | 0                                                                     | 0                                         | 235                                      |
| SnO <sub>2</sub> @GC@S5%  | 57                                  | 0.09                                                                  | 0.68                                      | 235                                      |
| SnO <sub>2</sub> @GC@S11% | 57                                  | 0.21                                                                  | 1.73                                      | 235                                      |
| SnO <sub>2</sub> @GC@S15% | 57                                  | 0.37                                                                  | 3.19                                      | 235                                      |
| SnO <sub>2</sub> @GC@S21% | 57                                  | 0.54                                                                  | 4.72                                      | 235                                      |
| SnO <sub>2</sub> @GC@S49% | 57                                  | 3.41                                                                  | 28.0                                      | 235                                      |
| SnO <sub>2</sub> 0%@GC@S  | 57                                  | 0.54                                                                  | 4.72                                      | 0                                        |
| SnO <sub>2</sub> 46%@GC@S | 57                                  | 0.54                                                                  | 4.72                                      | 117.5                                    |
| SnO <sub>2</sub> 67%@GC@S | 57                                  | 0.54                                                                  | 4.72                                      | 235                                      |
| SnO <sub>2</sub> 75%@GC@S | 57                                  | 0.54                                                                  | 4.72                                      | 470                                      |
| Sample                    | GO (mL)<br>(4 mg mL <sup>-1</sup> ) | Na <sub>2</sub> S <sub>2</sub> O <sub>3</sub> ·5H <sub>2</sub> O (g)  | HCl (mL)                                  | Si (mg)<br>(Solved in 28.5 mL ethanol)   |
| Si@GC@S44%                | 28.5                                | 1.27                                                                  | 10.29                                     | 57                                       |
| Si@GC@S72%                | 28.5                                | 3.41                                                                  | 28.00                                     | 57                                       |
| Sample                    | GO (mL)                             | PS suspension (mL)<br>(20 mg mL <sup>-1</sup> , sizes of 500–1000 nm) | SnCl <sub>4</sub> ·5H <sub>2</sub> O (mg) |                                          |
| SnO <sub>2</sub> @GC@PS   | 57                                  | 2                                                                     | 235                                       |                                          |
| Sample                    | GO (mL)                             | NaCl (mL)<br>(4 M)                                                    | SnCl <sub>4</sub> ·5H <sub>2</sub> O (mg) |                                          |
| SnO <sub>2</sub> @GC@NaCl | 57                                  | 50                                                                    | 235                                       |                                          |



**Supplementary Table 3.** The detailed results of calculated void spaces of SnO<sub>2</sub>@GCs.  $\rho$  is the monolith densities of SnO<sub>2</sub>@GC and Si@GC determined by Archimedes principle with a balance (Mettler Toledo XS205) equipped with accessories for the density determination;  $T_s$  and  $T_v$  are respectively the volume ratios of the original sulfur volume, void space to the SnO<sub>2</sub> volume in SnO<sub>2</sub>@GC and Si@GC;  $\rho'$  and  $T_{v1}$  are respectively the calculated density and calculated void space of SnO<sub>2</sub>@GC and Si@GC according to the equations of (2–4) in main text;  $T_{v2}$  is the volume ratio of the pore volume and the SnO<sub>2</sub> volume in SnO<sub>2</sub>@GC. These above results demonstrate minor errors among experimental data and calculations for densities and voids in SnO<sub>2</sub>@GCs and Si@GC. The differences between pore volume and the calculated void volume at a high sulfur content are mainly ascribed to the fact that the macropore volume is difficult to be ascertained by the N<sub>2</sub> adsorption-desorption measurement (the large pores over 500 nm in size cannot be identified by the N<sub>2</sub> adsorption-desorption isotherm).

|                               | SnO <sub>2</sub> @GC-0 | SnO <sub>2</sub> @GC-5 | SnO <sub>2</sub> @GC-11 | SnO <sub>2</sub> @GC-15 | SnO <sub>2</sub> @GC-21 | SnO <sub>2</sub> @GC-49 |
|-------------------------------|------------------------|------------------------|-------------------------|-------------------------|-------------------------|-------------------------|
| $\rho$ (g cm <sup>-3</sup> )  | 2.68                   | 2.51                   | 2.32                    | 2.25                    | 2.18                    | 1.16                    |
| $T_s$                         | 0                      | 0.26                   | 0.62                    | 0.88                    | 1.33                    | 4.81                    |
| $T_v$                         | 1.35                   | 1.61                   | 1.97                    | 2.23                    | 2.68                    | 6.16                    |
| $\rho'$ (g cm <sup>-3</sup> ) | 2.68                   | 2.51                   | 2.31                    | 2.18                    | 2.00                    | 1.19                    |
| $T_{v1}$                      | 1.35                   | 1.61                   | 1.97                    | 2.09                    | 2.24                    | 6.42                    |
| $T_{v2}$                      | 1.56                   | 1.87                   | 2.07                    | 2.18                    | 2.39                    | 2.96                    |

  

|                               | Si@GC-0 | Si@GC-44 | Si@GC-72 |
|-------------------------------|---------|----------|----------|
| $\rho$ (g cm <sup>-3</sup> )  | 1.14    | 0.79     | 0.44     |
| $T_s$                         | 0       | 1.70     | 5.67     |
| $T_v$                         | 1.97    | 3.67     | 7.64     |
| $\rho'$ (g cm <sup>-3</sup> ) | 1.14    | 0.79     | 0.47     |
| $T_{v1}$                      | 1.97    | 3.72     | 8.23     |

## Supplementary References

1. Luo, J. M. *et al.* Sn<sup>4+</sup> ion decorated highly conductive Ti<sub>3</sub>C<sub>2</sub> Mxene: promising lithium-ion anodes with enhanced volumetric capacity and cyclic performance. *ACS Nano* **10**, 2491–2499 (2016).
2. Li, Z. *et al.* Twin-functional graphene oxide: compacting with Fe<sub>2</sub>O<sub>3</sub> into a high volumetric capacity anode for lithium ion battery. *Energy Storage Mater.* **6**, 98–103 (2017).
3. Liu, J. Y. *et al.* High volumetric capacity three-dimensionally sphere-caged secondary battery anodes. *Nano Lett.* **16**, 4501–4507 (2016).
4. Wang, X. P. *et al.* High-density monolith of N-doped holey graphene for ultrahigh volumetric capacity of Li-ion batteries. *Adv. Energy Mater.* **6**, 1502100 (2016).
5. Liang, J. *et al.* Bowl-like SnO<sub>2</sub>@carbon hollow particles as an advanced anode material for lithium-ion batteries. *Angew. Chem. Int. Ed.* **53**, 12803–12807 (2014).
6. Wang, B. *et al.* High volumetric capacity silicon-based lithium battery anodes by nanoscale system engineering. *Nano Lett.* **13**, 5578–5584 (2013).
7. Xia, F. *et al.* Facile synthesis of free-standing silicon membranes with three-dimensional nanoarchitecture for anodes of lithium ion batteries. *Nano Lett.* **13**, 3340–3346 (2013).
8. Wu, H. *et al.* Stable Li-ion battery anodes by in-situ polymerization of conducting hydrogel to conformally coat silicon nanoparticles. *Nat. Commun.* **4**, 1943 (2013).
9. Chockla, A. M. *et al.* Silicon nanowire fabric as a lithium ion battery electrode material. *J. Am. Chem. Soc.* **133**, 20914–20921 (2011).
10. Yin, J. F., Cao, H. Q., Zhou, Z. F., Zhang, J. X. & Qu, M. Z. SnS<sub>2</sub>@reduced graphene oxide nanocomposites as anode materials with high capacity for rechargeable lithium ion batteries. *J. Mater. Chem.* **22**, 23963–23970 (2012).
11. Magasinski, A. *et al.* High-performance lithium-ion anodes using a hierarchical bottom-up approach. *Nat. Mater.* **9**, 353–358 (2010).
12. Hassan, F. M. *et al.* Evidence of covalent synergy in silicon-sulfur-graphene yielding highly efficient and long-life lithium-ion batteries. *Nat. Commun.* **6**, 8597 (2015).
13. Jeong, S. *et al.* Etched graphite with internally grown Si nanowires from pores as an anode for high density Li-ion batteries. *Nano Lett.* **13**, 3403–3407 (2013).
14. Zhang, H. W. *et al.* Tailoring the void size of iron oxide@carbon yolk-shell structure for optimized lithium storage. *Adv. Funct. Mater.* **24**, 4337–4342 (2014).

15. Liu, N. *et al.* A pomegranate-inspired nanoscale design for large-volume-change lithium battery anodes. *Nat. Nanotechnol.* **9**, 187–192 (2014).
16. Kovalenko, I. *et al.* A major constituent of brown algae for use in high-capacity Li-ion batteries. *Science* **334**, 75–79 (2011).
17. Lu, Z. D. *et al.* Nonfilling carbon coating of porous silicon micrometer-sized particles for high-performance lithium battery anodes. *ACS Nano* **9**, 2540–2547 (2015).
18. Chen, Z. *et al.* High-areal-capacity silicon electrodes with low-cost silicon particles based on spatial control of self-healing binder. *Adv. Energy Mater.* **5**, 1401826 (2015).
19. Son, I. H. *et al.* Silicon carbide-free graphene growth on silicon for lithium-ion battery with high volumetric energy density. *Nat. Commun.* **6**, 7393 (2015).
20. Suresh, S. *et al.* Protecting silicon film anodes in lithium-ion batteries using an atomically thin graphene drape. *ACS Nano* **11**, 5051–5061 (2017).
21. Zhang, X. H. *et al.* Silicene flowers: a dual stabilized silicon building block for high-performance lithium battery anodes. *ACS Nano* **11**, 7476–7484 (2017).
22. Ma, T. Y. *et al.* High volumetric capacity of hollow structured SnO<sub>2</sub>@Si nanospheres for lithium-ion batteries. *Nano Lett.* **17**, 3959–3964 (2017).
23. Dong, Y. F. *et al.* Air-stable porous Fe<sub>2</sub>N encapsulated in carbon microboxes with high volumetric lithium storage capacity and a long cycle life. *Nano Lett.* **17**, 5740–5746 (2017).
