# Supplementary material for: Caging tin oxide in three-dimensional graphene networks for superior volumetric lithium storage
Source: PubMed Central journal article supplement (PMC5786064; doi:10.1038/s41467-017-02808-2), 2018-01-26
Supplement: 41467_2017_2808_MOESM2_ESM.pdf [file 41467_2017_2808_MOESM2_ESM.pdf]

## Description of Additional Supplementary Files

File Name: Supplementary Movie 1

Description: Lithiation of SnO<sub>2</sub>@GC-21 with appropriate void space to observe the void space utilization. The movie is played at 8x speed.

File Name: Supplementary Movie 2

Description: Lithiation of SnO<sub>2</sub>@GC-21 with appropriate void space to observe the SnO<sub>2</sub> NPs expansion within the void of graphene network. The movie is played at 8x speed.

File Name: Supplementary Movie 3

Description: Lithiation of SnO<sub>2</sub>@GC-21 with appropriate void space to observe the single SnO<sub>2</sub> nanoparticle transformation. The movie is played at 8x speed.

File Name: Supplementary Movie 4

Description: Lithiation of SnO<sub>2</sub>@GC-0 with insufficient void space. The movie is played at 8x speed.

File Name: Supplementary Movie 5

Description: Lithiation of SnO<sub>2</sub>@GC-49 with excess void space. The movie is played at 8x speed.
